# Supplementary material for: Cooking Methods and Their Relationship with Anthropometrics and Cardiovascular Risk Factors among Older Spanish Adults
Source: MDPI journal article supplement (doi:10.3390/nu14163426), 2022-08-20
Supplement: s1 [file s1]

**Supplemental Table S1.** Cooking methods description.

| Cooking method | Description                                                                                                           |
|----------------|-----------------------------------------------------------------------------------------------------------------------|
| Raw            | Neither cooked nor preserved.                                                                                         |
| Boiling        | To cook in water or liquids when the temperature is at boiling point.                                                 |
| Roasting       | To cook in an oven using hot air or radiation.                                                                        |
| Pan-frying     | To cook food in a pan with the minimum amount of oil.                                                                 |
| Frying         | To cook in hot fats or oils where the food is immersed; when the food is breaded, floured or battered and then fried. |
| Toasting       | Browning of the food using radiant heat.                                                                              |
| Sautéing       | To cook food quickly with a few tablespoons of oil in a skillet over a medium to high heat.                           |
| Stewing        | To boil slowly or simmering in a liquid for a long period of time at a low heat.                                      |

**Supplemental Table S2.** Adjusted means (95% confidence interval), percentage difference, and p for linear trend across quintiles of fried food consumption.

|                                                 | Fried food consumption |                     |                     |                     |                     | PD    | p      |
|-------------------------------------------------|------------------------|---------------------|---------------------|---------------------|---------------------|-------|--------|
|                                                 | Q1                     | Q2                  | Q3                  | Q4                  | Q5                  |       |        |
| <b>n (median, g/kg of body weight) in men</b>   | 232 (0.038)            | 232 (0.131)         | 232 (0.230)         | 231 (0.335)         | 231 (0.557)         |       |        |
| <b>n (median, g/kg of body weight) in women</b> | 262 (0.034)            | 262 (0.082)         | 261 (0.177)         | 262 (0.340)         | 261 (0.561)         |       |        |
| <b>Anthropometrics</b>                          |                        |                     |                     |                     |                     |       |        |
| <b>Weight (kg)</b>                              | 72.0 (71.4-72.6)       | 73.1 (72.4-73.7)    | 73.1 (72.4-73.7)    | 72.4 (71.8-73.1)    | 68.9 (68.2-69.5)    | -4.30 | <0.001 |
| <b>BMI (kg/m2)</b>                              | 27.7 (27.5-57.8)       | 28.0 (27.8-28.2)    | 28.1 (27.9-28.2)    | 27.9 (27.8-28.1)    | 27.0 (26.8-27.1)    | -2.50 | <0.001 |
| <b>MUAC (cm)</b>                                | 28.7 (28.6-28.8)       | 29.1 (29.0-29.2)    | 29.0 (28.9-29.1)    | 28.6 (28.5-28.7)    | 27.6 (27.5-27.7)    | -3.80 | <0.001 |
| <b>Waist circumference (cm)</b>                 | 95.4 (94.8-95.9)       | 96.6 (96.1-97.1)    | 97.1 (96.5-97.6)    | 96.4 (95.8-97.0)    | 94.2 (93.7-94.8)    | -1.30 | <0.001 |
| <b>Hip circumference (cm)</b>                   | 103.5 (103.2-103.8)    | 103.5 (103.2-103.8) | 103.9 (103.6-104.2) | 103.1 (102.8-103.4) | 100.7 (100.3-101)   | -2.70 | <0.001 |
| <b>Calf circumference (cm)</b>                  | 34.2 (34.1-34.3)       | 34.3 (34.2-34.4)    | 34.2 (34.1-34.3)    | 33.6 (33.5-33.7)    | 32.7 (32.6-32.8)    | -4.40 | <0.001 |
| <b>Cardiovascular risk factors</b>              |                        |                     |                     |                     |                     |       |        |
| <b>Total cholesterol (mg/dL)</b>                | 192.1 (190.1-193.6)    | 188.4 (187.0-189.9) | 188.4 (186.9-189.9) | 190.4 (188.9-191.9) | 190.5 (189.2-191.9) | -0.80 | 0.671  |
| <b>HDL-cholesterol (mg/dL)</b>                  | 54.4 (53.8-55.0)       | 53.1 (52.5-53.7)    | 53.8 (53.2-54.4)    | 54.0 (53.4-54.6)    | 55.0 (54.4-55.6)    | 1.10  | 0.201  |
| <b>LDL-cholesterol (mg/dL)</b>                  | 115.6 (114.4-116.8)    | 113.1 (112.0-114.2) | 112.3 (111.2-113.5) | 113.9 (112.8-115.0) | 113.2 (112.2-114.2) | -2.10 | 0.273  |
| <b>Triglycerides (mg/dL)</b>                    | 103.3 (102.4-104.1)    | 105.2 (104.3-106.2) | 104.3 (103.4-105.2) | 105.3 (104.4-106.2) | 104.3 (103.4-105.2) | 1.00  | 0.707  |
| <b>Glucose (mg/dL)</b>                          | 96.3 (95.7-96.9)       | 98.2 (97.6-98.8)    | 96.5 (95.9-97.1)    | 99.0 (98.4-99.6)    | 98.2 (97.6-98.7)    | 2.00  | 0.665  |
| <b>HbA1c (%)</b>                                | 5.71 (5.69-5.74)       | 5.81 (5.78-5.83)    | 5.78 (5.76-5.81)    | 5.76 (5.73-5.79)    | 5.88 (5.85-5.91)    | 3.00  | 0.176  |
| <b>Insulin (μU/mL)</b>                          | 9.47 (9.25-9.69)       | 10.4 (10.1-106)     | 9.81 (9.55-10.1)    | 10.2 (9.94-10.4)    | 9.45 (9.17-9.74)    | -0.20 | 0.215  |
| <b>Blood pressure</b>                           |                        |                     |                     |                     |                     |       |        |
| <b>Casual SBP (mmHg)</b>                        | 135.6 (135.4-135.8)    | 134.3 (134.1-134.5) | 135.5 (135.3-135.7) | 136.2 (136.0-136.4) | 136.4 (136.2-136.6) | 0.60  | 0.525  |
| <b>Casual DBP (mmHg)</b>                        | 79.6 (79.3-79.9)       | 79.3 (79.0-79.5)    | 80.2 (80.0-80.8)    | 80.6 (80.3-80.8)    | 80.4 (80.1-80.7)    | 1.00  | 0.354  |
| <b>Casual HR (bpm)</b>                          | 70.0 (69.8-70.3)       | 70.3 (70.0-70.5)    | 69.9 (69.7-70.1)    | 70.7 (70.5-70.9)    | 70.0 (69.7-70.2)    | 0.00  | 0.819  |
| <b>24 h-SBP (mmHg)</b>                          | 126.0 (125.8-126.1)    | 126.3 (126.1-126.4) | 127.5 (127.3-127.6) | 127.8 (127.6-128.0) | 128.0 (127.9-128.2) | 1.60  | 0.044  |
| <b>24 h-DBP (mmHg)</b>                          | 73.8 (73.6-74.0)       | 74.2 (74.0-74.4)    | 74.7 (74.5-75.0)    | 74.6 (74.3-74.8)    | 75.0 (74.7-75.2)    | 1.60  | 0.103  |
| <b>24 h-HR (bpm)</b>                            | 67.4 (67.1-67.6)       | 67.8 (67.6-68.0)    | 67.7 (67.5-68.0)    | 68.6 (68.3-68.8)    | 68.5 (68.2-68.7)    | 1.60  | 0.056  |
| <b>Cardiac function biomarkers</b>              |                        |                     |                     |                     |                     |       |        |
| <b>NT-proBNP (pg/mL)</b>                        | 87.0 (84.6-89.4)       | 79.6 (77.5-81.7)    | 87.6 (85.4-89.9)    | 87.1 (84.9-89.3)    | 90.8 (88.5-93.3)    | 4.30  | 0.150  |
| <b>Troponin T (ng/L)</b>                        | 9.40 (9.20-9.60)       | 9.30 (9.10-9.50)    | 9.70 (9.50-9.90)    | 9.80 (9.50-9.90)    | 10.0 (9.80-10.2)    | 6.40  | 0.077  |

Analyses were adjusted for sex, age (continuous), educational level (primary or less, secondary, university), cigarette smoking status (former, current, never), alcohol consumption (continuous), ex-drinker status (yes, no), recreational physical activity in METS-hours/week (continuous), household physical activity in METS-hours/week (continuous), hours of television (continuous), number of chronic diseases (continuous), number of prescribed medications (continuous), energy intake in Kcal/d (continuous), very long chain omega-3 fatty acids consumption (continuous), and fiber consumption (continuous).

PDs: percentage difference calculated as [(5th quintile – 1st quintile)/ 1st quintile] x 100, p: p for linear trend. BMI: Body Mass Index, MUAC: Mid-Upper Arm Circumference, SBP: Systolic Blood Pressure, DBP: Diastolic Blood Pressure, HR: Heart rate. Analyses for HbA1c and insulin were performed in a nested subsample of 1,066 participants

**Supplemental Table S3.** Adjusted means (95% confidence interval), percentage difference, and p for linear trend across quintiles of toasted food consumption.

|                                                 | Toasted food consumption |                     |                     |                     |                     | PD    | <i>p</i> |
|-------------------------------------------------|--------------------------|---------------------|---------------------|---------------------|---------------------|-------|----------|
|                                                 | Q1                       | Q2                  | Q3                  | Q4                  | Q5                  |       |          |
| <b>n (median, g/kg of body weight) in men</b>   | 340 (0.00)               | 124 (0.140)         | 232 (0.529)         | 232 (0.900)         | 231 (1.40)          |       |          |
| <b>n (median, g/kg of body weight) in women</b> | 293 (0.00)               | 231 (0.016)         | 231 (0.540)         | 262 (0.914)         | 261 (1.31)          |       |          |
| <b>Anthropometrics</b>                          |                          |                     |                     |                     |                     |       |          |
| <b>Weight (kg)</b>                              | 73.1 (72.5-73.6)         | 72.3 (71.6-73.0)    | 73.6 (72.9-74.2)    | 72.8 (72.2-73.4)    | 67.5 (66.9-68.1)    | -7.70 | <0.001   |
| <b>BMI (kg/m2)</b>                              | 28.2 (28.0-28.3)         | 27.2 (28.11+28.4)   | 28.3 (28.2-28.5)    | 27.8 (27.7-28.0)    | 26.1 (26.0-26.2)    | -7.60 | <0.001   |
| <b>MUAC (cm)</b>                                | 28.5 (28.4-28.6)         | 28.6 (28.5-28.7)    | 28.9 (28.9-29.0)    | 29.1 (29.0-29.1)    | 28.0 (27.9-28.1)    | -1.80 | 0.448    |
| <b>Waist circumference (cm)</b>                 | 97.2 (96.7-97.7)         | 96.0 (95.4-96.5)    | 97.3 (96.4-97.4)    | 96.9 (96.4-97.4)    | 92.0 (91.4-92.5)    | -5.40 | <0.001   |
| <b>Hip circumference (cm)</b>                   | 102.9 (102.6-103.2)      | 104.1 (103.8-104.5) | 104.3 (104.0-104.6) | 103.4 (103.1-103.7) | 100.2 (99.9-100.5)  | -2.60 | <0.001   |
| <b>Calf circumference (cm)</b>                  | 33.7 (33.6-33.8)         | 33.8 (33.7-33.9)    | 34.2 (34.1-34.3)    | 34.2 (34.1-34.2)    | 33.2 (33.1-33.3)    | -1.50 | 0.070    |
| <b>Cardiovascular risk factors</b>              |                          |                     |                     |                     |                     |       |          |
| <b>Total cholesterol (mg/dL)</b>                | 186.0 (184.7-187.3)      | 193.2 (191.6-194.8) | 189.3 (187.9-190.7) | 90.8 (189.4-192.3)  | 192.6 (191.1-194.1) | 3.60  | 0.647    |
| <b>HDL-cholesterol (mg/dL)</b>                  | 53.5 (52.9-54.0)         | 55.1 (54.4-55.7)    | 53.0 (52.5-53.6)    | 53.9 (53.3-54.5)    | 55.4 (54.8-55.9)    | 3.60  | 0.863    |
| <b>LDL-cholesterol (mg/dL)</b>                  | 109.8 (108.8-110.8)      | 115.6 (114.3-116.8) | 113.8 (112.7-114.8) | 14.2 (113.1-115.2)  | 116.5 (115.4-117.5) | 6.10  | 0.252    |
| <b>Triglycerides (mg/dL)</b>                    | 106.5 (105.6-107.3)      | 105.9 (104.9-106.9) | 105.7 (104.7-106.7) | 06.6 (105.8-107.5)  | 97.7 (96.9-98.5)    | -8.30 | 0.119    |
| <b>Glucose (mg/dL)</b>                          | 100.8 (100.3-101.4)      | 97.1 (96.5-97.7)    | 97.1 (96.597.7)     | 98.7 (98.1-99.3)    | 93.4 (93.0-94.1)    | -7.30 | 0.002    |
| <b>HbA1c (%)</b>                                | 5.84 (5.81-5.87)         | 5.74 (5.71-5.78)    | 5.33 (5.71-5.76)    | 5.83 (5.81-5.86)    | 5.75 (5.72-5.78)    | -1.50 | 0.544    |
| <b>Insulin (μU/mL)</b>                          | 9.80 (9.54-10.1)         | 10.7 (10.4-11.1)    | 9.87 (9.61-10.1)    | 10.1 (9.88-10.3)    | 9.22 (9.01-9.44)    | -5.90 | 0.602    |
| <b>Blood pressure</b>                           |                          |                     |                     |                     |                     |       |          |
| <b>Casual SBP (mmHg)</b>                        | 136.7 (136.5-136.9)      | 136.2 (135.9-136.4) | 135.2 (135.0-135.4) | 35.3 (135.1-135.5)  | 134.4 (134.2-134.6) | -1.70 | 0.045    |
| <b>Casual DBP (mmHg)</b>                        | 80.7 (80.4-80.9)         | 80.2 (79.9-80.5)    | 79.9 (79.7-80.2)    | 79.7 (79.4-80.0)    | 79.4 (79.1-79.6)    | -1.60 | 0.019    |
| <b>Casual HR (bpm)</b>                          | 70.8 (70.6-71.0)         | 70.9 (70.6-71.2)    | 69.8 (69.6-70.1)    | 70.3 (70.0-70.5)    | 69.1 (68.9-69.3)    | -2.40 | 0.040    |
| <b>24 h-SBP (mmHg)</b>                          | 128.5 (128.4-128.7)      | 128.2 (128.0-128.4) | 126.5 (126.3-126.7) | 27.2 (127.0-127.3)  | 125.1 (124.9-125.2) | -2.70 | 0.001    |
| <b>24 h-DBP (mmHg)</b>                          | 75.2 (74.9-75.4)         | 74.5 (74.3-7.8)     | 74.4 (74.2-74.6)    | 74.4 (74.1-74.6)    | 73.6 (73.4-73.8)    | -2.10 | <0.001   |
| <b>24 h-HR (bpm)</b>                            | 68.4 (68.2-68.6)         | 68.7 (68.5-69.0)    | 68.1 (67.8-68.3)    | 68.2 (68.0-68.4)    | 66.6 (66.4-66.8)    | -2.60 | 0.017    |
| <b>Cardiac function biomarkers</b>              |                          |                     |                     |                     |                     |       |          |
| <b>NT-proBNP (pg/mL)</b>                        | 90.3 (88.1-92.5)         | 93.3 (90.4-96.3)    | 83.2 (81.1-85.3)    | 79.9 (77.9-82.0)    | 86.5 (84.3-88.7)    | -4.20 | 0.321    |
| <b>Troponin T (ng/L)</b>                        | 10.0 (9.80-10.1)         | 9.60 (9.40-9.90)    | 9.80 (9.60-10.0)    | 9.40 (9.20-9.60)    | 9.20 (9.00-9.40)    | -8.00 | 0.388    |

Analyses were adjusted for sex, age (continuous), educational level (primary or less, secondary, university), cigarette smoking status (former, current, never), alcohol consumption (continuous), ex-drinker status (yes, no), recreational physical activity in METS-hours/week (continuous), household physical activity in METS-hours/week (continuous), hours of television (continuous), number of chronic diseases (continuous), number of prescribed medications (continuous), energy intake in Kcal/d (continuous), very long chain omega-3 fatty acids consumption (continuous), and fiber consumption (continuous).

PDs: percentage difference calculated as [(5th quintile – 1st quintile)/ 1st quintile] x 100, p: p for linear trend. BMI: Body Mass Index, MUAC: Mid-Upper Arm Circumference, SBP: Systolic Blood Pressure, DBP: Diastolic Blood Pressure, HR: Heart rate. Analyses for HbA1c and insulin were performed in a nested subsample of 1,066 participants.

**Supplemental Table S4.** Adjusted means (95% confidence interval), percentage difference, and p for linear trend across quintiles of sautéed food consumption.

|                                                 | Sautéed food consumption |                     |                     |                     |                      | PD    | p      |
|-------------------------------------------------|--------------------------|---------------------|---------------------|---------------------|----------------------|-------|--------|
|                                                 | Q1                       | Q2                  | Q3                  | Q4                  | Q5                   |       |        |
| <b>n (median, g/kg of body weight) in men</b>   | 232 (0.042)              | 232 (0.154)         | 232 (0.261)         | 232 (0.373)         | 231 (0.603)          |       |        |
| <b>n (median, g/kg of body weight) in women</b> | 262 (0.029)              | 262 (0.152)         | 261 (0.260)         | 262 (0.371)         | 261 (0.618)          |       |        |
| <b>Anthropometrics</b>                          |                          |                     |                     |                     |                      |       |        |
| <b>Weight (kg)</b>                              | 72.6 (72.0-73.2)         | 73.0 (72.4-73.6)    | 72.7 (72.1-73.3)    | 71.4 (70.8-72.0)    | 69.7 (69.0-80.3)     | -4.00 | <0.001 |
| <b>BMI (kg/m2)</b>                              | 27.8 (27.7-28.0)         | 28.0 (27.9-28.2)    | 28.0 (27.8-28.1)    | 27.6 (27.5-27.8)    | 27.2 (27.0-27.3)     | -2.20 | 0.002  |
| <b>MUAC (cm)</b>                                | 28.7 (28.6-28.8)         | 28.7 (28.6-28.8)    | 28.8 (28.7-28.9)    | 28.6 (28.6-28.7)    | 28.2 (28.1-28.2)     | -1.70 | 0.008  |
| <b>Waist circumference (cm)</b>                 | 96.3 (95.8-96.8)         | 96.7 (96.1-97.2)    | 96.6 (96.1-97.2)    | 95.6 (95.1-96.1)    | 94.5 (93.9-95.0)     | -1.90 | 0.001  |
| <b>Hip circumference (cm)</b>                   | 103.0 (102.7-103.3)      | 103.3 (103.0-103.6) | 103.7 (103.4-104.0) | 103.2 (102.9-103.5) | 101.5 (101.2-101.8)  | -1.50 | 0.010  |
| <b>Calf circumference (cm)</b>                  | 33.8 (33.8-33.9)         | 33.9(33.8-34.0)     | 34.0 (33.9-34.1)    | 33.8 (33.8-33.9)    | 33.4 (33.3-33.4)     | -1.20 | 0.015  |
| <b>Cardiovascular risk factors</b>              |                          |                     |                     |                     |                      |       |        |
| <b>Total cholesterol (mg/dL)</b>                | 189.9 (188.4-191.4)      | 188.5 (187.0-190.0) | 190.7 (189.3-192.1) | 189.8 (188.4-191.2) | 191.1 (189.5-192.5)  | 0.60  | 0.633  |
| <b>HDL-cholesterol (mg/dL)</b>                  | 55.1 (54.5-55.7)         | 53.7 (53.1-54.3)    | 53.6 (53.0-24.3)    | 53.8 (53.3-54.4)    | 54.1 (53.5-54.7)     | -1.80 | 0.363  |
| <b>LDL-cholesterol (mg/dL)</b>                  | 112.8 (111.7-113.9)      | 111.7 (110.6-112.9) | 114.8 (113.7-115.9) | 114.4 (113.3-115.5) | 114.5 (113.4-115.5)  | 1.50  | 0.239  |
| <b>Triglycerides (mg/dL)</b>                    | 103.4 (120.5-104.4)      | 109.0 (108.1-110.0) | 140.3 (103.4-105.2) | 101.1 (100.3-102.0) | 104.5 (103.6-105.4)  | 1.10  | 0.248  |
| <b>Glucose (mg/dL)</b>                          | 96.1 (95.5-96.7)         | 99.0 (98.4-99.5)    | 97.9 (97.3-98.5)    | 97.4 (96.8-97.9)    | 97.9 (97.3-98.5)     | 1.90  | 0.360  |
| <b>HbA1c (%)</b>                                | 5.73 (5.71-5.76)         | 5.83 (5.80-5.86)    | 5.81 (5.79-5.84)    | 5.77 (5.74-5.79)    | 5.78 (5.75-5.81)     | 0.90  | 0.970  |
| <b>Insulin (μU/mL)</b>                          | 9.89 (9.65-10.1)         | 9.95 (9.68-10.2)    | 10.3 (10.1-10.6)    | 9.58 (9.34-9.82)    | 9.62 (9.37-9.86)     | -2.70 | 0.192  |
| <b>Blood pressure</b>                           |                          |                     |                     |                     |                      |       |        |
| <b>Casual SBP (mmHg)</b>                        | 135.9 (135.7-136.1)      | 136.2 (136.0-136.4) | 135.3 (135.1-135.5) | 136.0 (135.8-136.2) | 135.7 (134.5-134.9)  | -0.20 | 0.325  |
| <b>Casual DBP (mmHg)</b>                        | 80.2 (79.9-80.4)         | 80.5 (80.2-80.8)    | 80.3 (80.0-80.6)    | 79.7(79.4-80.0)     | 79.3 (79.0-79.6)     | -1.10 | 0.047  |
| <b>Casual HR (bpm)</b>                          | 69.4 (69.1-69.6)         | 70.9 (70.7-71.2)    | 70.1 (69.9-70.3)    | 69.8 (69.5-70.0)    | 70.7 (70.4-70.9)     | 1.90  | 0.641  |
| <b>24 h-SBP (mmHg)</b>                          | 127.5 (127.4-127.7)      | 127.5 (127.3-127.7) | 127.0 (126.9-127.2) | 126.7 (126.6-126.9) | 126.7 (126.52-126.9) | -0.60 | 0.168  |
| <b>24 h-DBP (mmHg)</b>                          | 74.6 (74.4-74.8)         | 74.7 (74.5-75.0)    | 74.7 (74.4-74.9)    | 74.2 (73.9-74.4)    | 74.1 (73.9-74.4)     | -0.70 | 0.088  |
| <b>24 h-HR (bpm)</b>                            | 67.7 (67.5-67.9)         | 68.3 (68.1-68.5)    | 68.1 (67.9-68.4)    | 67.7 (67.4-67.9)    | 68.1 (67.9-68.3)     | 0.70  | 0.653  |
| <b>Cardiac function biomarkers</b>              |                          |                     |                     |                     |                      |       |        |
| <b>NT-proBNP (pg/mL)</b>                        | 88.3 (86.0-90.6)         | 93.5 (91.0-96.1)    | 79.4 (77.3-81.6)    | 85.8 (83.6-87.9)    | 85.3 (83.2-87.6)     | -3.40 | 0.437  |
| <b>Troponin T (ng/L)</b>                        | 9.80 (9.60-10.0)         | 10.2 (10.0-10.4)    | 9.40 (9.20-9.60)    | 9.40 (9.20-9.60)    | 9.30 (9.10-9.50)     | -5.10 | 0.007  |

Analyses were adjusted for sex, age (continuous), educational level (primary or less, secondary, university), cigarette smoking status (former, current, never), alcohol consumption (continuous), ex-drinker status (yes, no), recreational physical activity in METS-hours/week (continuous), household physical activity in METS-hours/week (continuous), hours of television (continuous), number of chronic diseases (continuous), number of prescribed medications (continuous), energy intake in Kcal/d (continuous), very long chain omega-3 fatty acids consumption (continuous), and fiber consumption (continuous).

PDs: percentage difference calculated as [(5th quintile – 1st quintile)/ 1st quintile] x 100, p: p for linear trend. BMI: Body Mass Index, MUAC: Mid-Upper Arm Circumference, SBP: Systolic Blood Pressure, DBP: Diastolic Blood Pressure, HR: Heart rate. Analyses for HbA1c and insulin were performed in a nested subsample of 1,066 participants.

**Supplemental Table S5.** Adjusted means (95% confidence interval), percentage difference, and p for linear trend across quintiles of stewed food consumption.

|                                                 | Stewed food consumption |                     |                     |                     |                     | PD    | p      |
|-------------------------------------------------|-------------------------|---------------------|---------------------|---------------------|---------------------|-------|--------|
|                                                 | Q1                      | Q2                  | Q3                  | Q4                  | Q5                  |       |        |
| <b>n (median, g/kg of body weight) in men</b>   | 232 (0.000)             | 232 (0.054)         | 232 (0.167)         | 232 (0.321)         | 231 (0.604)         |       |        |
| <b>n (median, g/kg of body weight) in women</b> | 262 (0.000)             | 262 (0.081)         | 261 (0.165)         | 262 (0.336)         | 261 (0.647)         |       |        |
| <b>Anthropometrics</b>                          |                         |                     |                     |                     |                     |       |        |
| <b>Weight (kg)</b>                              | 73.5 (72.9-74.2)        | 73.4 (72.8-74.0)    | 71.1 (70.5-71.8)    | 71.9 (71.3-72.6)    | 69.4 (68.8-70.0)    | -5.60 | <0.001 |
| <b>BMI (kg/m2)*</b>                             | 28.3 (28.1-28.5)        | 28.2 (28.0-28.3)    | 27.5 (27.4-27.7)    | 27.6 (27.5-27.8)    | 27.0 (26.8-27.2)    | -4.60 | <0.001 |
| <b>MUAC (cm)*</b>                               | 28.8 (28.7-28.9)        | 28.8 (28.7-28.9)    | 28.4 (28.3-28.5)    | 28.4 (28.3-28.5)    | 28.6 (28.5-28.7)    | -0.70 | 0.002  |
| <b>Waist circumference (cm)</b>                 | 96.7 (96.2-97.3)        | 97.5 (96.9-98.0)    | 95.4 (94.9-96.0)    | 96.1 (95.6-96.7)    | 93.9 (93.4-94.4)    | -2.90 | <0.001 |
| <b>Hip circumference (cm)</b>                   | 104.1 (103.8-104.4)     | 103.6 (103.3-103.9) | 102.8 (102.5-103.1) | 102.7 (102.5-103.0) | 101.4 (101.1-101.7) | -2.60 | <0.001 |
| <b>Calf circumference (cm)</b>                  | 33.8 (33.8-33.9)        | 33.9 (33.8-34.0)    | 33.6 (33.5-33.7)    | 33.8 (33.7-33.9)    | 33.8 (33.7-33.9)    | 0.00  | 0.084  |
| <b>Cardiovascular risk factors</b>              |                         |                     |                     |                     |                     |       |        |
| <b>Total cholesterol (mg/dL)</b>                | 188.4 (186.9-189.9)     | 189.2 (187.7-190.7) | 190.2 (188.7-191.7) | 189.5 (188.0-191.0) | 192.5 (191.2-192.9) | 2.20  | 0.384  |
| <b>HDL-cholesterol (mg/dL)</b>                  | 54.1 (53.5-54.7)        | 53.2 (52.6-53.7)    | 54.1 (53.5-54.7)    | 53.9 (53.3-54.4)    | 55.1 (54.6-55.7)    | 1.80  | 0.145  |
| <b>LDL-cholesterol (mg/dL)</b>                  | 111.6 (110.5-112.8)     | 113.7 (112.6-114.8) | 114.4 (113.3-115.5) | 112.8 (111.7-113.9) | 115.6 (114.6-116.6) | 3.60  | 0.436  |
| <b>Triglycerides (mg/dL)</b>                    | 106.2 (105.3-107.2)     | 104.8 (103.8-105.7) | 102.7 (101.8-103.6) | 106.7 (105.7-107.6) | 102.1 (101.2-103.0) | -3.90 | 0.160  |
| <b>Glucose (mg/dL)</b>                          | 97.9 (97.3-98.5)        | 98.7 (98.2-99.3)    | 97.4 (96.8-98.0)    | 97.3 (96.7-97.9)    | 96.9 (96.3-97.4)    | -1.00 | 0.239  |
| <b>HbA1c (%)</b>                                | 5.81 (5.78-5.84)        | 5.80 (5.77-5.83)    | 5.78 (5.75-5.80)    | 5.77 (5.75-5.80)    | 5.75 (5.72-5.77)    | -1.00 | 0.276  |
| <b>Insulin (μU/mL)</b>                          | 10.2 (9.96-10.5)        | 9.94 (9.69-10.2)    | 9.96 (9.71-10.2)    | 9.55 (9.32-9.79)    | 9.63 (9.37-9.89)    | -5.60 | 0.038  |
| <b>Blood pressure</b>                           |                         |                     |                     |                     |                     |       |        |
| <b>Casual SBP (mmHg)</b>                        | 136.4 (136.2-136.6)     | 135.5 (135.3-135.7) | 135.1 (134.9-135.3) | 135.2 (135.0-135.4) | 135.8 (135.6-136.0) | -0.40 | 0.514  |
| <b>Casual DBP (mmHg)</b>                        | 79.8 (79.5-80.1)        | 80.0 (79.7-80.2)    | 80.5 (80.2-80.8)    | 79.8 (79.5-80.0)    | 80.0 (79.7-80.3)    | 0.30  | 0.447  |
| <b>Casual HR (bpm)</b>                          | 70.9 (70.7-71.1)        | 69.7 (69.4-69.9)    | 70.5 (70.2-70.7)    | 69.7 (69.5-70.0)    | 70.0 (69.8-70.3)    | -1.30 | 0.100  |
| <b>24 h-SBP (mmHg)</b>                          | 127.6 (127.4-127.8)     | 127.9 (127.7-128.1) | 127.1 (126.9-127.3) | 126.4 (126.2-126.6) | 126.5 (126.4-126.7) | -0.90 | 0.039  |
| <b>24 h-DBP (mmHg)</b>                          | 74.4 (74.2-74.7)        | 74.6 (74.4-74.9)    | 74.5 (74.3-74.8)    | 74.3 (74.0-74.5)    | 74.4 (74.2-74.6)    | 0.00  | 0.261  |
| <b>24 h-HR (bpm)</b>                            | 68.4 (68.1-68.6)        | 67.7 (67.4-67.9)    | 68.1 (67.9-68.3)    | 67.9(67.7-68.1)     | 67.9 (67.7-68.1)    | -0.70 | 0.313  |
| <b>Cardiac function biomarkers</b>              |                         |                     |                     |                     |                     |       |        |
| <b>NT-proBNP (pg/mL)</b>                        | 88.8 (86.4-91.2)        | 87.5 (85.2-89.8)    | 87.9 (85.6-90.3)    | 85.6 (83.4-87.8)    | 82.1 (80.0-84.3)    | -7.50 | 0.521  |
| <b>Troponin T (ng/L)</b>                        | 9.80 (9.60-10.0)        | 9.70 (9.50-9.90)    | 10.1 (9.90-10.3)    | 9.40 (9.20-9.60)    | 9.20 (9.00-9.40)    | -6.10 | 0.078  |

Analyses were adjusted for sex, age (continuous), educational level (primary or less, secondary, university), cigarette smoking status (former, current, never), alcohol consumption (continuous), ex-drinker status (yes, no), recreational physical activity in METS-hours/week (continuous), household physical activity in METS-hours/week (continuous), hours of television (continuous), number of chronic diseases (continuous), number of prescribed medications (continuous), energy intake in Kcal/d (continuous), very long chain omega-3 fatty acids consumption (continuous), and fiber consumption (continuous).

PDs: percentage difference calculated as [(5th quintile – 1st quintile)/ 1st quintile] x 100, p: p for linear trend. BMI: Body Mass Index, MUAC: Mid-Upper Arm Circumference, SBP: Systolic Blood Pressure, DBP: Diastolic Blood Pressure, HR: Heart rate. Analyses for HbA1c and insulin were performed in a nested subsample of 1,066 participants.

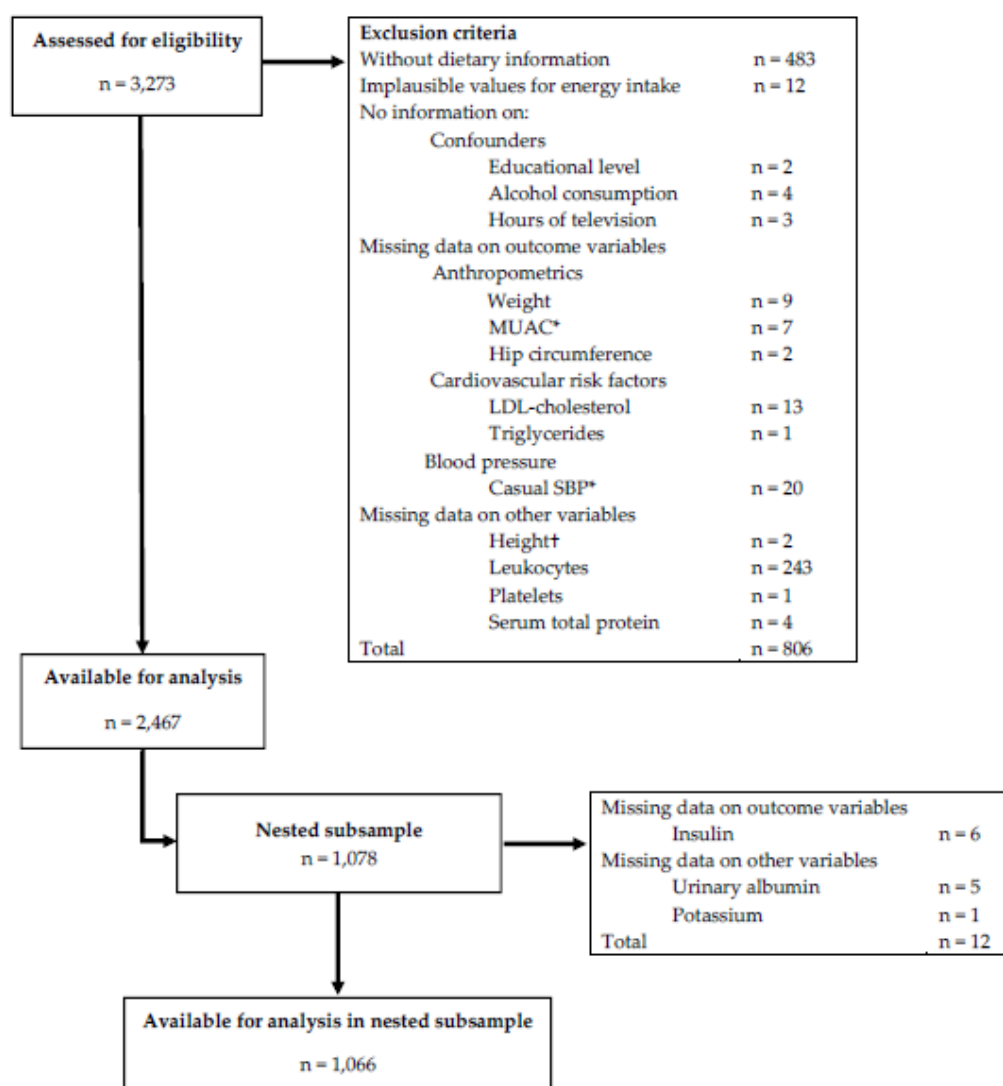

†Height used to calculate Body Mass Index (BMI).

\*MUAC: Mid-Upper Arm Circumference, SBP: systolic blood pressure.

**Supplemental Figure S1: Flow chart**
